# Supplementary material for: Does the platinum-loading in proton-exchange membrane fuel cell cathodes influence the durability of the membrane-electrode assembly?
Source: Royal Society of Chemistry journal article supplement (doi:10.1039/d3im00059a), 2023-01-01
Supplement: d3im00059a1.pdf [file d3im00059a1.pdf]

Supporting Information (SI):

**Does the platinum-loading in proton-exchange membrane fuel cell  
cathodes influence the durability of the membrane-electrode  
assembly?**

Ricardo Sgarbi<sup>1a</sup>, William Ait Idir<sup>2a</sup>, Quentin Labarde<sup>1</sup>, Michel Mermoux<sup>1</sup>, Peizhe Wu<sup>2</sup>, Julia  
Mainka<sup>2</sup>, Jérôme Dillet<sup>2</sup>, Clémence Marty<sup>3</sup>, Fabrice Micoud<sup>3</sup>, Olivier Lottin<sup>2</sup>, Marian  
Chatenet<sup>1\*</sup>

<sup>1</sup>*Univ. Grenoble Alpes, Univ. Savoie Mont Blanc, CNRS, Grenoble INP (Institute of  
Engineering and Management Univ. Grenoble Alpes), LEPMI, 38000 Grenoble, France*

<sup>2</sup>*LEMTA - Université de Lorraine - CNRS, Nancy, France*

<sup>3</sup>*Univ. Grenoble Alpes, CEA, LITEN, F-38054, Grenoble, France*

\* Corresponding author. E-mail address: marian.chatenet@grenoble-inp.fr

<sup>a</sup>: the authors equally contributed to the work

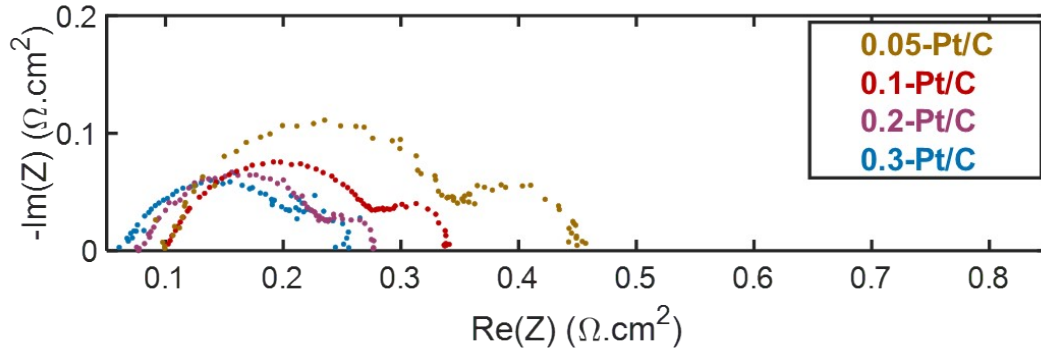

**Fig. S1** EIS diagrams recorded at BOT for the four  $x$ -Pt/C MEAs at 1 A cm<sup>-2</sup>.

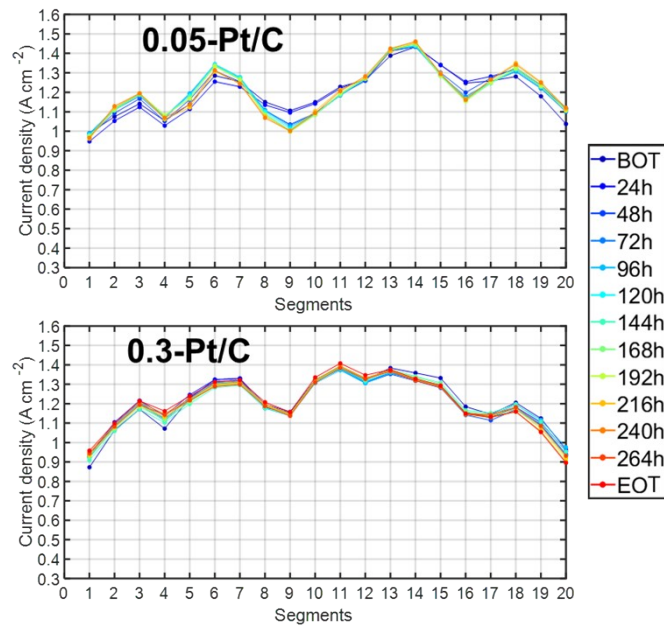

**Fig. S2** Local current density along the gas channel measured at overall 1 A cm<sup>-2</sup> in a segmented cell for CLs 0.05-Pt/C and 0.3-Pt/C. Segment #1 corresponds to the air inlet at the cathode and H<sub>2</sub> outlet at the anode, while segment #20 corresponds to the air outlet at the cathode and H<sub>2</sub> inlet at the anode.

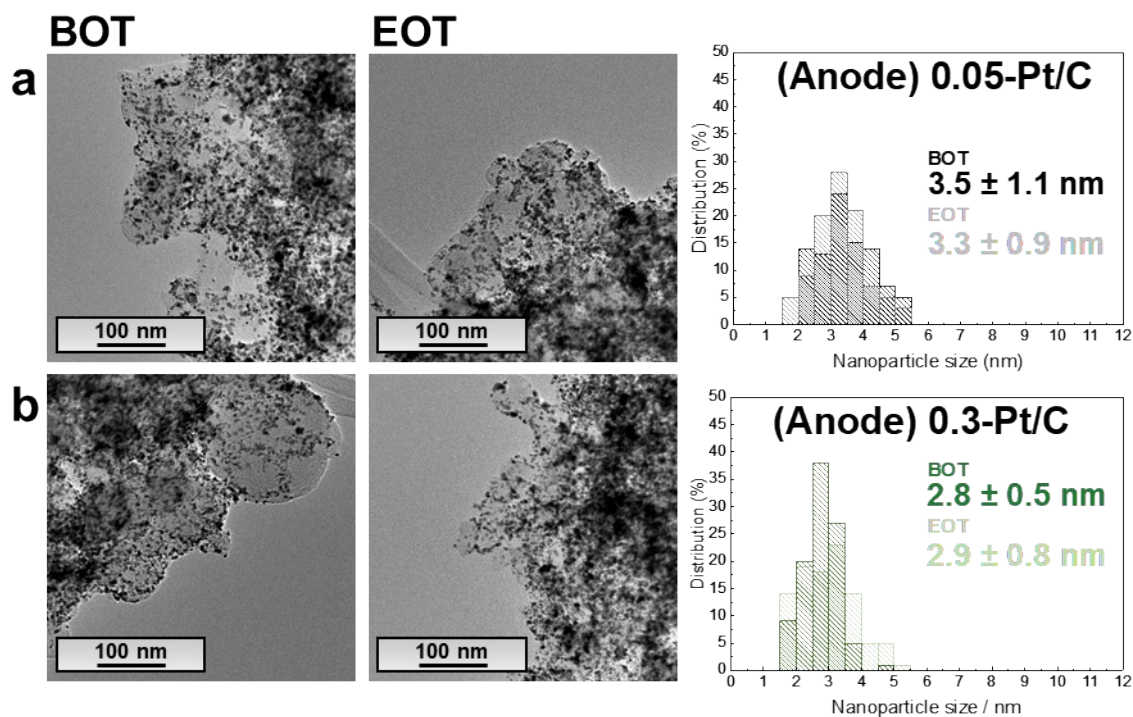

**Fig. S3** Representative TEM images, corresponding nanoparticle size distribution histograms and mean nanoparticles diameter values for the active materials scrapped from anode CLs at Beginning of Test (BOT) and End of Test (EOT): **(a)** 0.05-Pt/C and **(b)** 0.3-Pt/C.

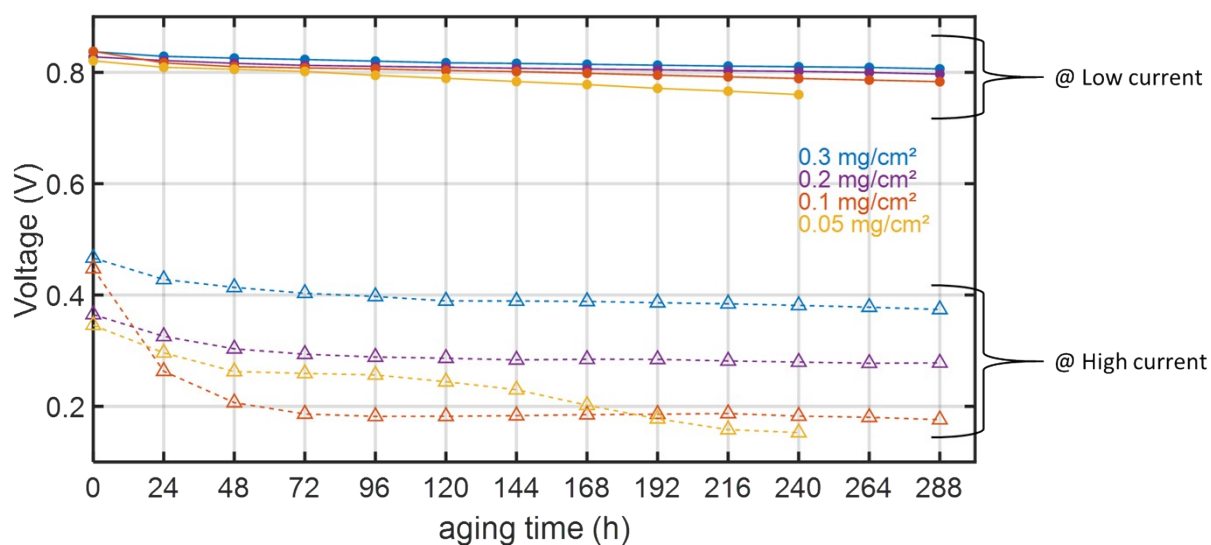

**Fig. S4** Cell voltages during their daily characterization step divided on low and high current regions for 0.05-Pt/C, 0.1-Pt/C, 0.2-Pt/C and 0.3-Pt/C cathode CLs.

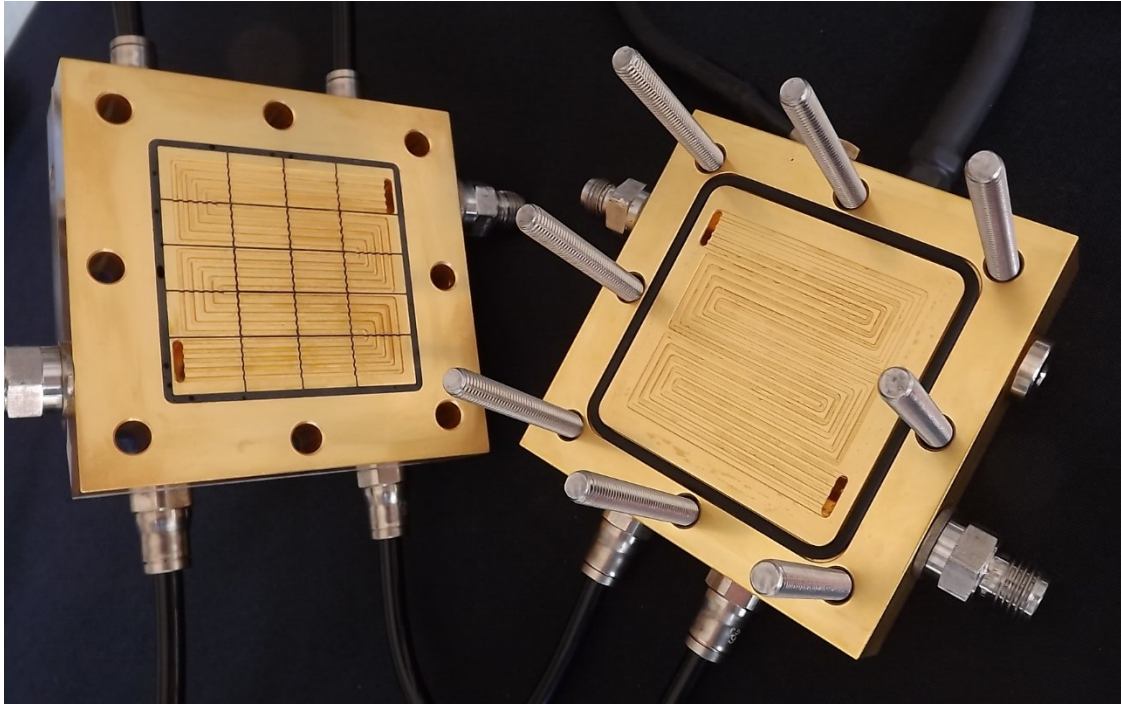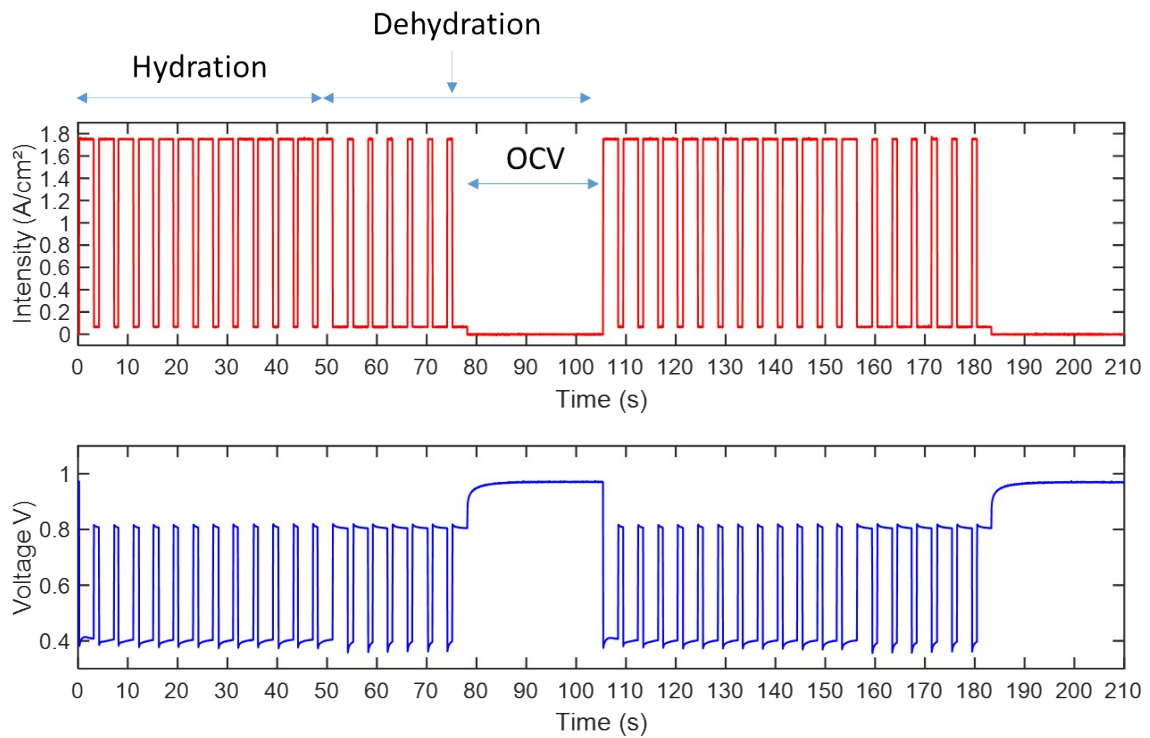

**Fig. S5** Photograph of the  $5 \times 5 = 25 \text{ cm}^2$  segmented PEMFC illustrating the flow fields pattern.

**Fig. S6** Accelerated Stress Test (AST) - 105 s sequence combining load cycling + humidity cycling + OCV. Dehydration occurs when the duration of the high current sequence is reduced

from 3 s to 1 s (while that of the low current sequences is increased from 1 s to 3 s) and during OCV. The gas flow rates are maintained constant during the whole of the AST, as well as their RH (50%).
